# Supplementary material for: Freeze-thaw processes correspond to the protection-loss of soil organic carbon through regulating pore structure of aggregates in alpine ecosystems
Source: Copernicus journal article supplement (doi:10.5194/egusphere-2024-1833), 2024-07-08
Supplement: Supplementary file 1 [file egusphere-2024-1833-supplement.pdf]

Supplementary Table 1. Basic soil physio-chemical properties

| Ecosystem          | Soil depth<br>(cm) | Bulk density<br>(g/cm <sup>3</sup> ) | Soil water content<br>(%) | pH   | Organic carbon<br>(g/kg) | Total nitrogen<br>(g/kg) | Particle size composition<br>(%) |       |       |
|--------------------|--------------------|--------------------------------------|---------------------------|------|--------------------------|--------------------------|----------------------------------|-------|-------|
|                    |                    |                                      |                           |      |                          |                          | clay                             | silt  | sand  |
| KPM<br>(meadow)    | 0-10               | 0.77                                 | 35.76                     | 6.50 | 85.26                    | 7.66                     | 9.05                             | 33.60 | 57.35 |
|                    | 10-30              | 0.93                                 | 32.00                     | 6.49 | 67.12                    | 6.94                     | 10.65                            | 36.83 | 53.52 |
|                    | 30-50              | 1.00                                 | 24.18                     | 7.17 | 25.35                    | 2.66                     | 11.84                            | 34.88 | 53.28 |
| PFS<br>(shrubland) | 0-10               | 0.80                                 | 42.57                     | 6.64 | 64.42                    | 7.00                     | 13.95                            | 47.56 | 38.49 |
|                    | 10-30              | 0.81                                 | 32.40                     | 6.82 | 44.11                    | 4.30                     | 14.59                            | 46.85 | 38.56 |
|                    | 30-50              | 0.96                                 | 22.82                     | 7.31 | 36.44                    | 3.38                     | 15.05                            | 47.44 | 37.50 |

**Note:** KPM-*Kobresia pygmaea* meadow; PFS- *Potentilla fruticosa* shrub. The properties were measured with samples taken in the unstable freezing period.

Supplementary Table 2. Mass proportions of soil aggregates in alpine ecosystems during the seasonal freeze–thaw process

| Ecosystem          | Aggregate fraction | Mass proportion of aggregates (%) |              |              |               |
|--------------------|--------------------|-----------------------------------|--------------|--------------|---------------|
|                    |                    | UFP                               | SFP          | UTP          | STP           |
| KPM<br>(meadow)    | > 2 mm             | 34.55±6.80ab                      | 41.14±11.36a | 29.83±8.72b  | 38.86±12.90ab |
|                    | 0.25-2 mm          | 46.29±5.60a                       | 37.29±7.77b  | 48.73±6.86a  | 42.97±11.81ab |
|                    | 0.053-0.25 mm      | 16.61±3.64                        | 16.73±5.73   | 20.27±4.32   | 15.56±5.09    |
|                    | <0.053 mm          | 2.55±0.80a                        | 4.84±2.74a   | 1.16±0.81b   | 2.61±1.61ab   |
| PFS<br>(shrubland) | > 2 mm             | 32.17±5.49                        | 34.52±13.59  | 26.57±6.66   | 30.03±8.52    |
|                    | 0.25-2 mm          | 47.30±5.80a                       | 35.40±6.50b  | 51.72±8.65a  | 45.02±7.17a   |
|                    | 0.053-0.25 mm      | 18.07±3.28b                       | 22.50±7.40a  | 18.72±4.28ab | 21.00±7.10ab  |
|                    | <0.053 mm          | 2.49±1.62ab                       | 7.75±3.50a   | 2.92±2.16b   | 3.95±3.52ab   |

Note: Bars represent the mean ± standard error (n=9). Uppercase letters represent significant differences among FT periods (P<0.05).
